# Supplementary material for: Facile fabrication of highly porous Co3O4 nanobelts as anode materials for lithium-ion batteries
Source: Royal Society of Chemistry journal article supplement (doi:10.1039/c5ra23835h), 2016-01-01
Supplement: c5ra23835h1.pdf [file c5ra23835h1.pdf]

## Facile Fabrication of Highly Porous $\text{Co}_3\text{O}_4$ Nanobelts as Anode Materials for Lithium-ion Batteries

Fangcai Zheng,<sup>a,b,c\*</sup> Kai Shi,<sup>a</sup> Shihao Xu,<sup>a</sup> Xianyu Liang,<sup>a</sup> Youcun Chen<sup>a</sup> and Yuanguang Zhang<sup>a</sup>

<sup>a</sup> Anhui Provincial Laboratory of Optoelectronic and Magnetism Functional Materials, School of Chemistry and Engineering, Anqing Normal University, Anqing 246011, PR China

<sup>b</sup> High Magnetic Field Laboratory, Hefei Institute of Physical Science, Chinese Academy of Science, Hefei 230031, PR China

<sup>c</sup> Shanghai Key Laboratory of Materials Protection and Advanced Materials in Electric Power, Shanghai 200090, PR China

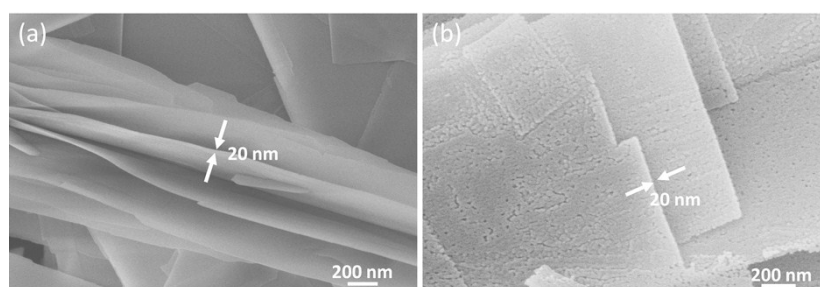

**Figure S1.** SEM images of  $\text{Co}(\text{OH})_2$  precursor (a) and  $\text{Co}_3\text{O}_4$  nanobelts (b).

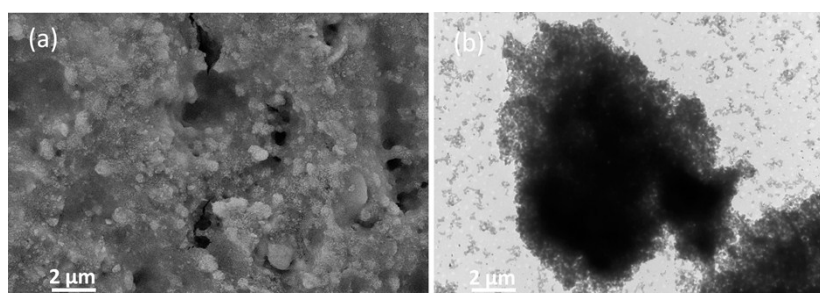

**Figure S2.** Morphological analysis of the electrode cycled for 100 cycles at a current density of  $100 \text{ mA g}^{-1}$ . (a) SEM and (b) TEM images of the electrode.

---

\* zfc@mail.ustc.edu.cn
